# Supplementary material
Source: MDPI journal article supplement (https://www.mdpi.com/2073-4352/11/5/571)
Supplement: s1 [file s1 › crystals-1186975-supplem conversion.pdf]

# Synthesis of 1-[(Aryl)(3-amino-5-oxopyrazolidin-4-ylidene) methyl]-2-oxo-1,2-dihydroquinoline-3-carboxylic acid Derivatives and their Breast Anticancer Activity

Ahmed Gaber <sup>1,2</sup>, Walaa F. Alsanie <sup>2,3</sup>, Majid Alhomrani <sup>2,3</sup>, Abdulhakeem S. Alamri <sup>2,3</sup>, Ibrahim M. El-Deen <sup>4</sup> and Moamen S. Refat <sup>5,\*</sup>

<sup>1</sup> Department of Biology, College of Science, Taif University, P.O. Box 11099, Taif 21944, Saudi Arabia; a.gaber@tu.edu.sa

<sup>2</sup> Center of Biomedical Sciences Research, Taif University, P.O. Box 11099, Taif 21944, Saudi Arabia; w.alsanie@tu.edu.sa (W.F.A.); m.alhomrani@tu.edu.sa (M.A.); a.alamri@tu.edu.sa (A.S.A.)

<sup>3</sup> Department of Clinical Laboratories Sciences, The Faculty of Applied Medical Sciences, Taif University, P.O. Box 11099, Taif 21944, Saudi Arabia

<sup>4</sup> Department of Chemistry, Faculty of Science, Port Said University, Port Said 42511, Egypt; Ibrahimm@psu.edu.eg

<sup>5</sup> Department of Chemistry, College of Science, Taif University, P.O. Box 11099, Taif 21944, Saudi Arabia

\* Correspondence: moamen@tu.edu.sa

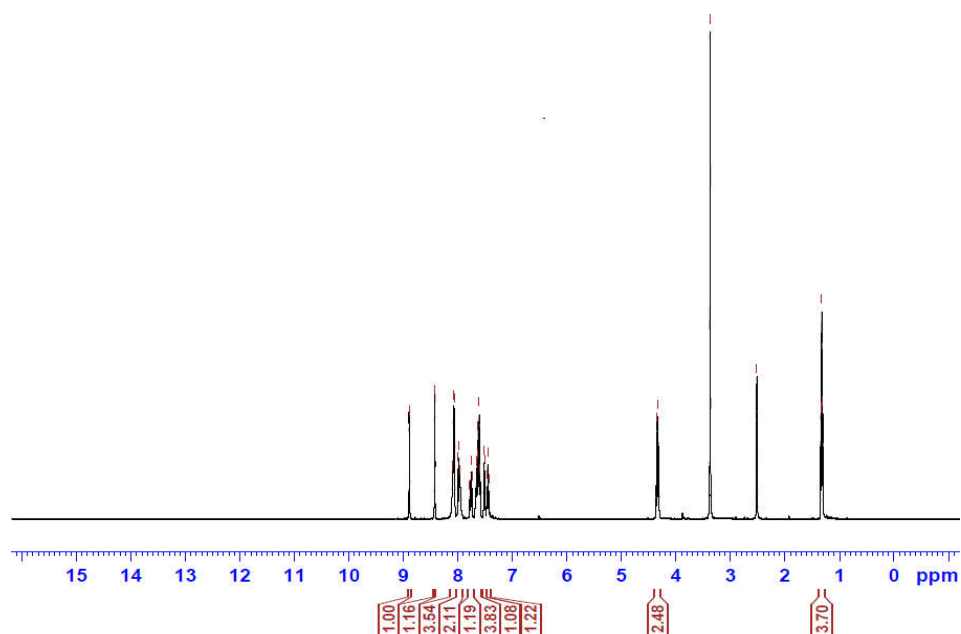

Figure S1.  $^1\text{H}$ -NMR spectrum of compound 7a.

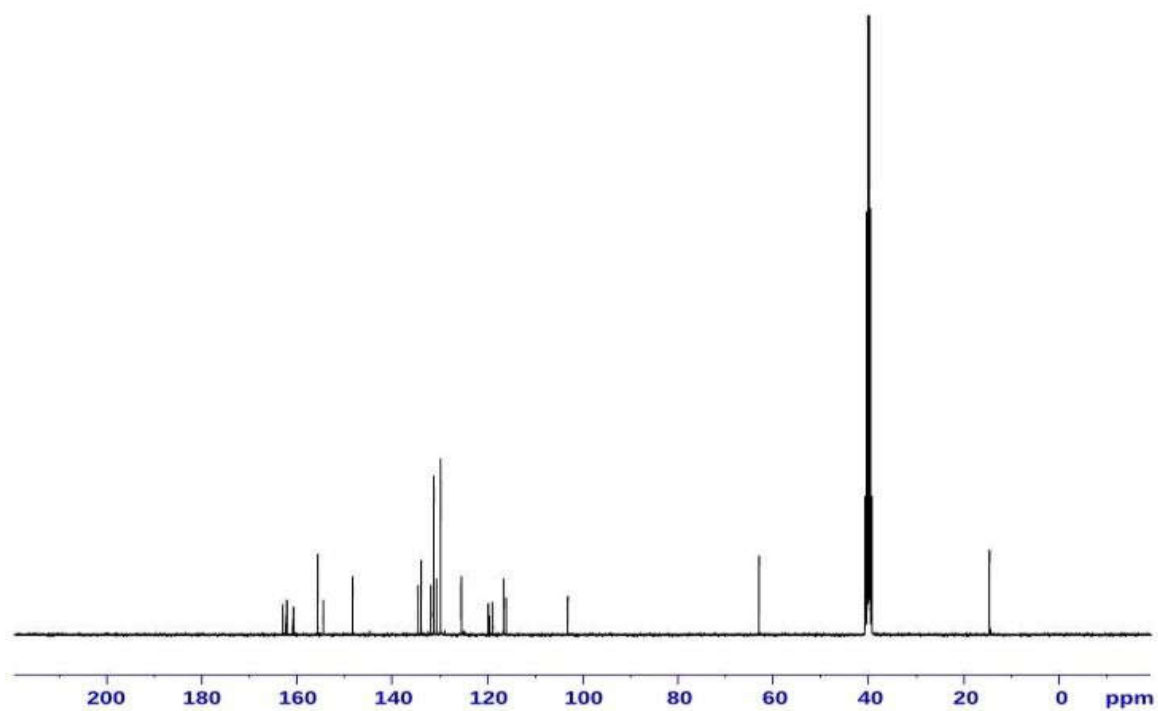

Figure S2.  $^{13}\text{C}$ -NMR spectrum of compound 7a.

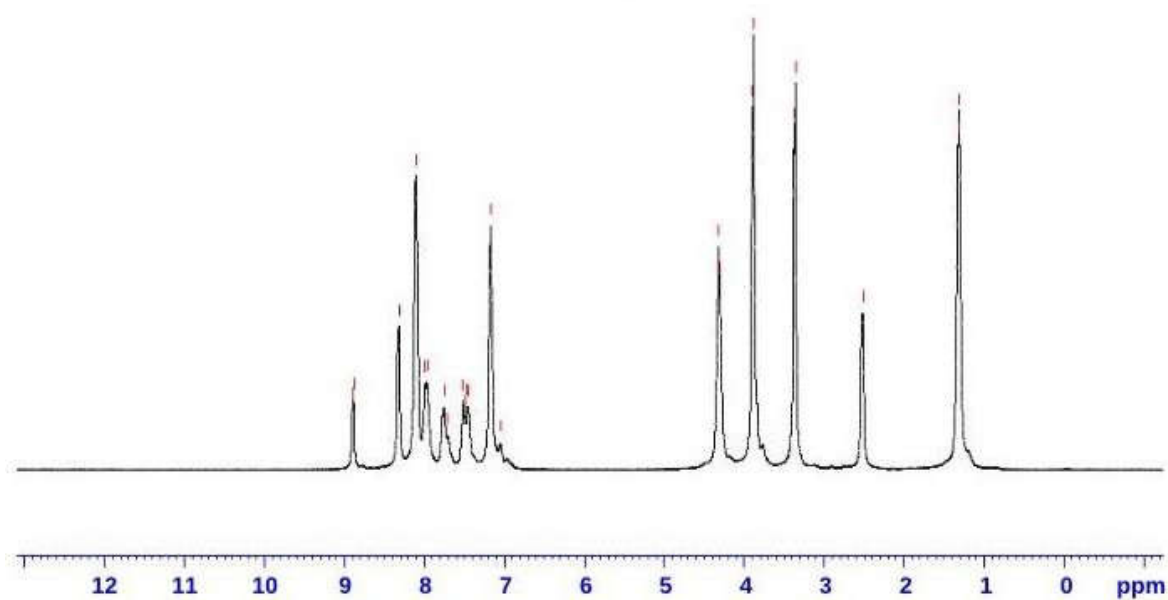

Figure S3:  $^1\text{H}$ -NMR spectrum of compound 7b.

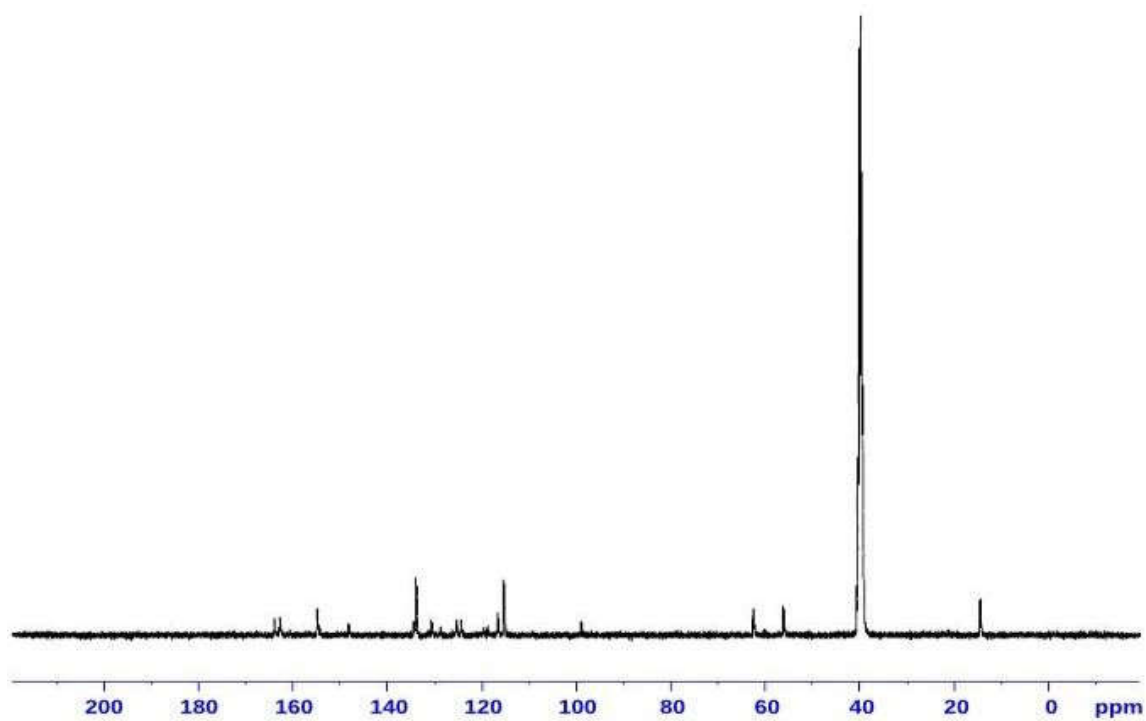

Figure S4:  $^{13}\text{C}$ -NMR spectrum of compound 7b.

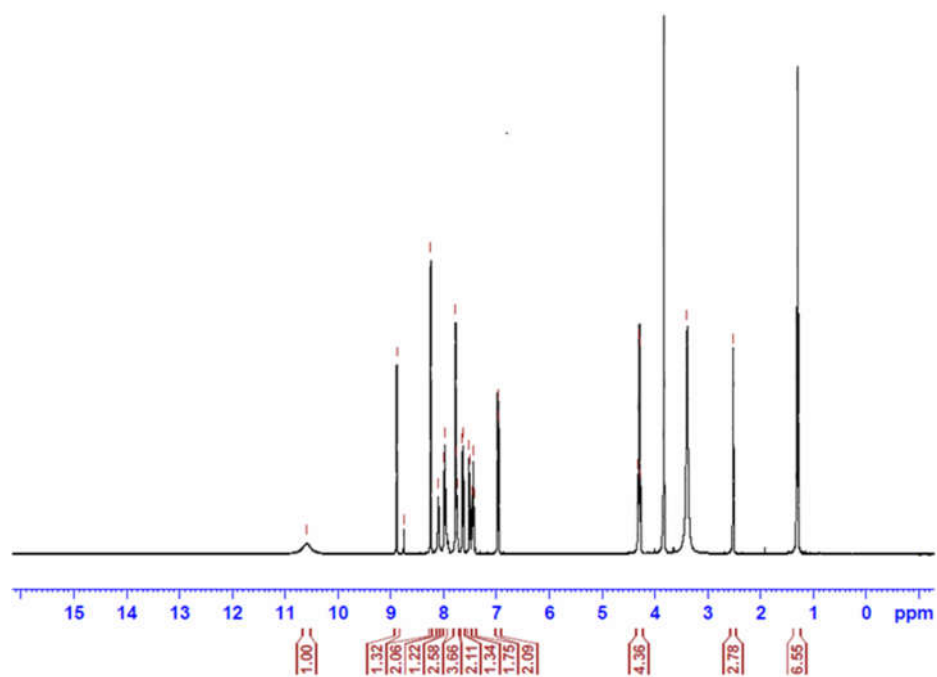

Figure S5:  $^1\text{H}$ -NMR spectrum of compound 7c.

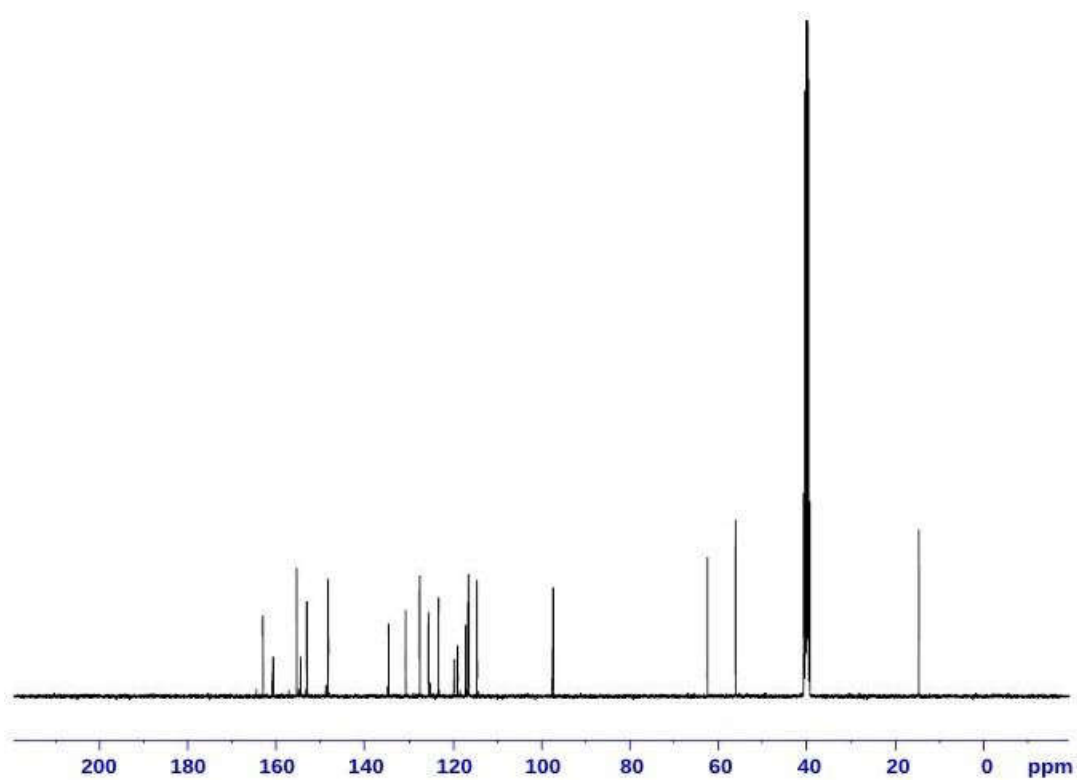

Figure S6:  $^{13}\text{C}$ -NMR spectrum of compound 7c.

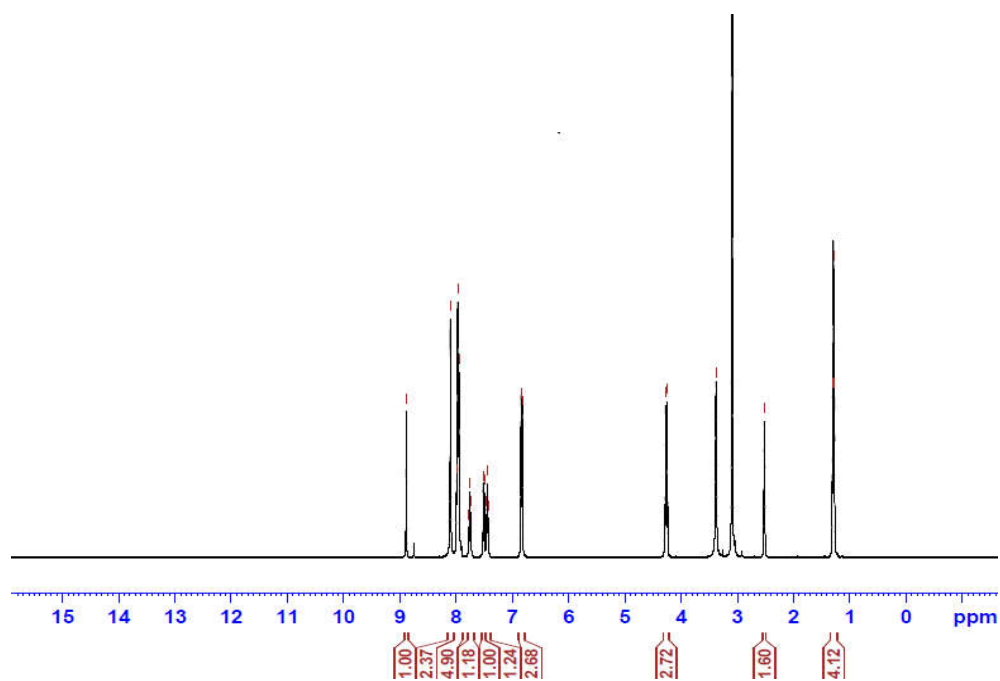

Figure S7:  $^1\text{H}$ -NMR spectrum of compound 7d.

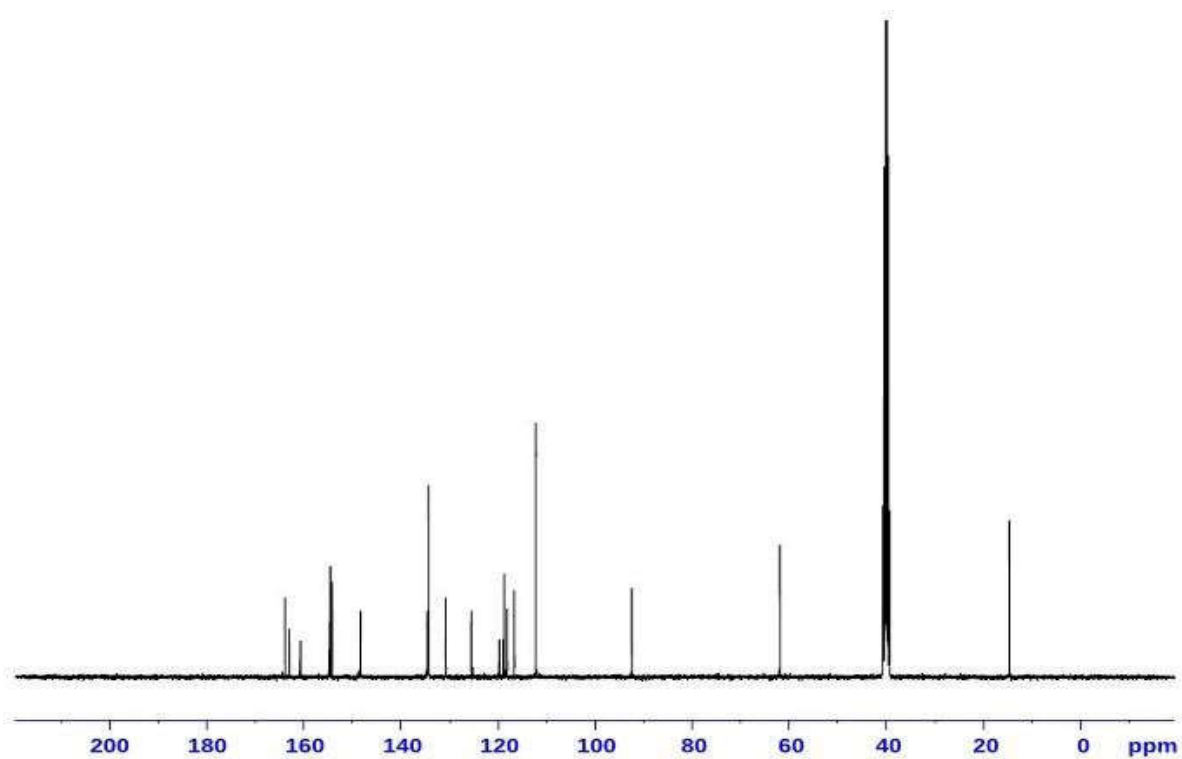

Figure S8:  $^{13}\text{C}$ -NMR spectrum of compound 7d.

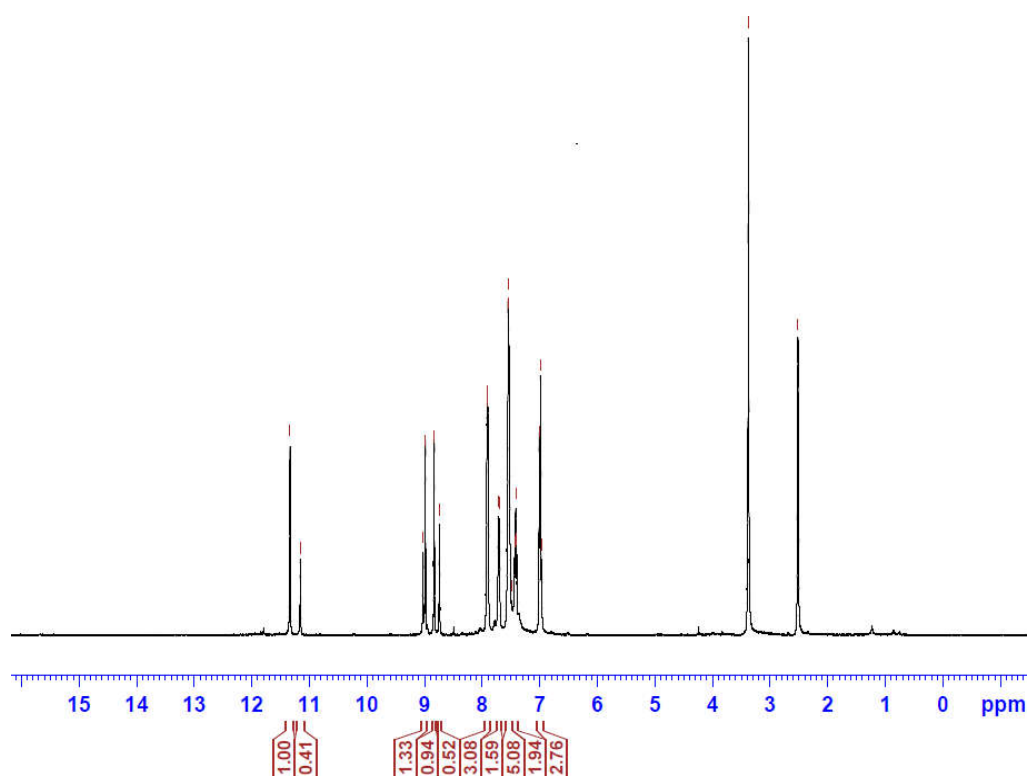

Figure S9:  $^1\text{H}$ -NMR spectrum of compound 8a.

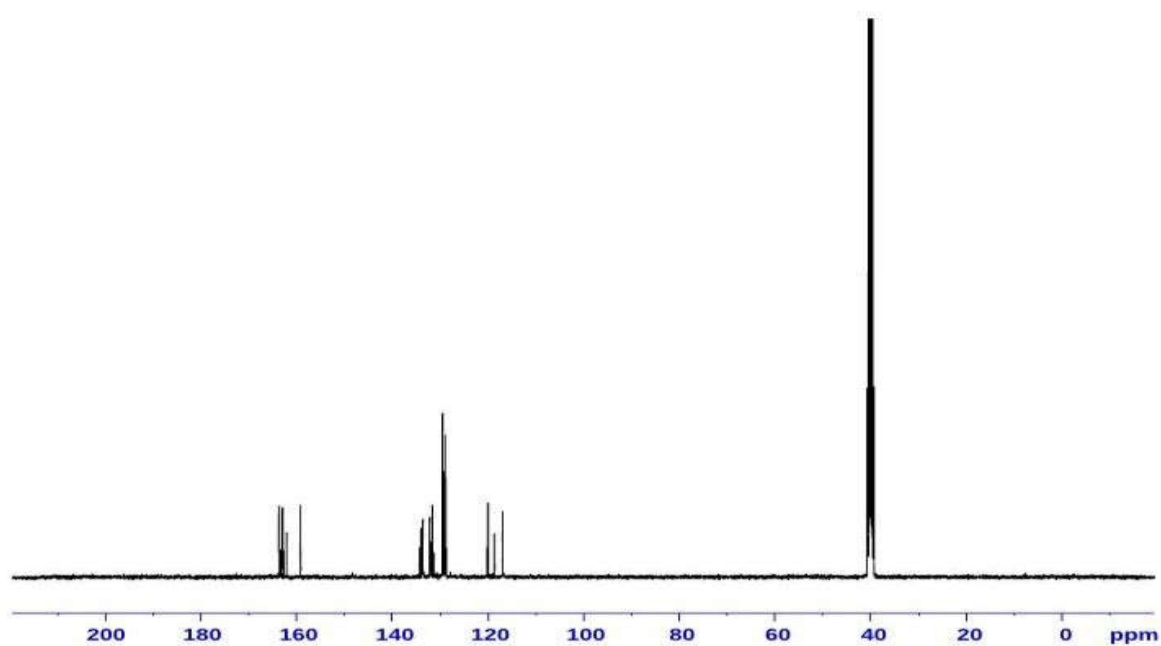

Figure S10:  $^{13}\text{C}$ -NMR spectrum of compound 8a.

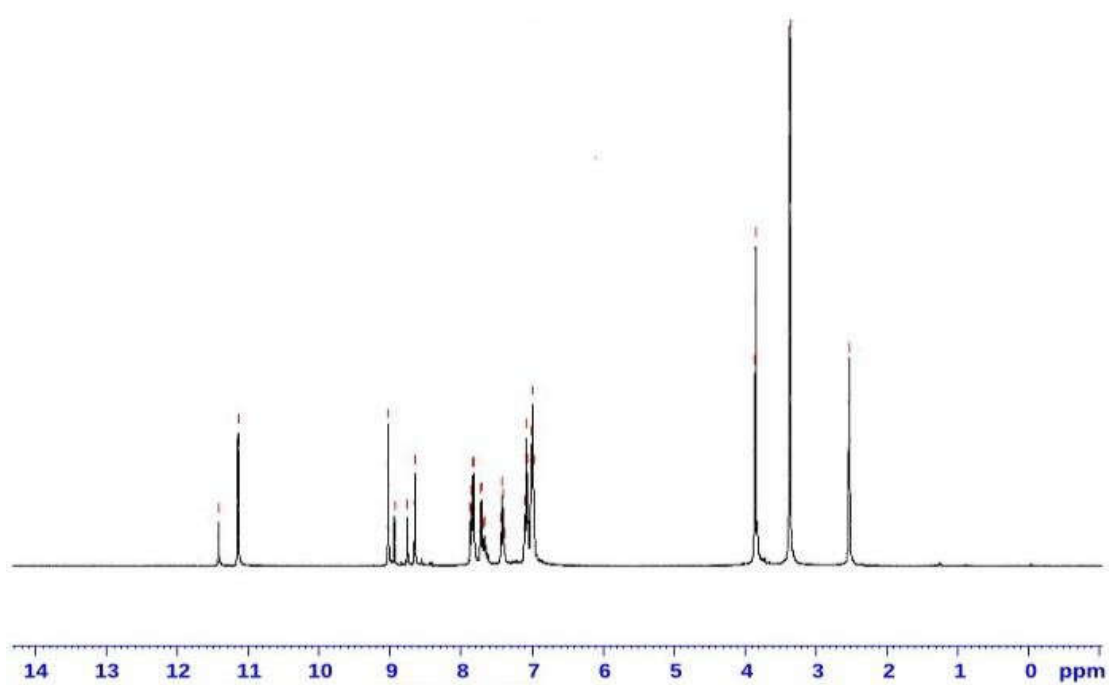

Figure S11:  $^1\text{H}$ -NMR spectrum of compound **8b**.

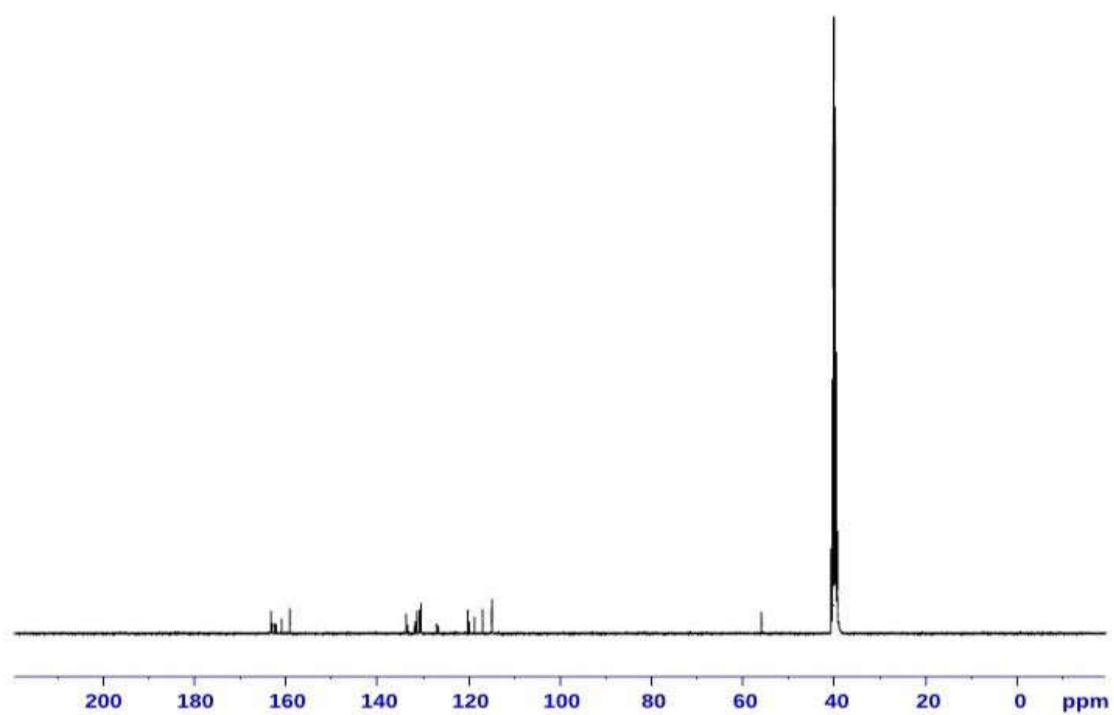

Figure S12:  $^{13}\text{C}$ -NMR spectrum of compound **8b**.

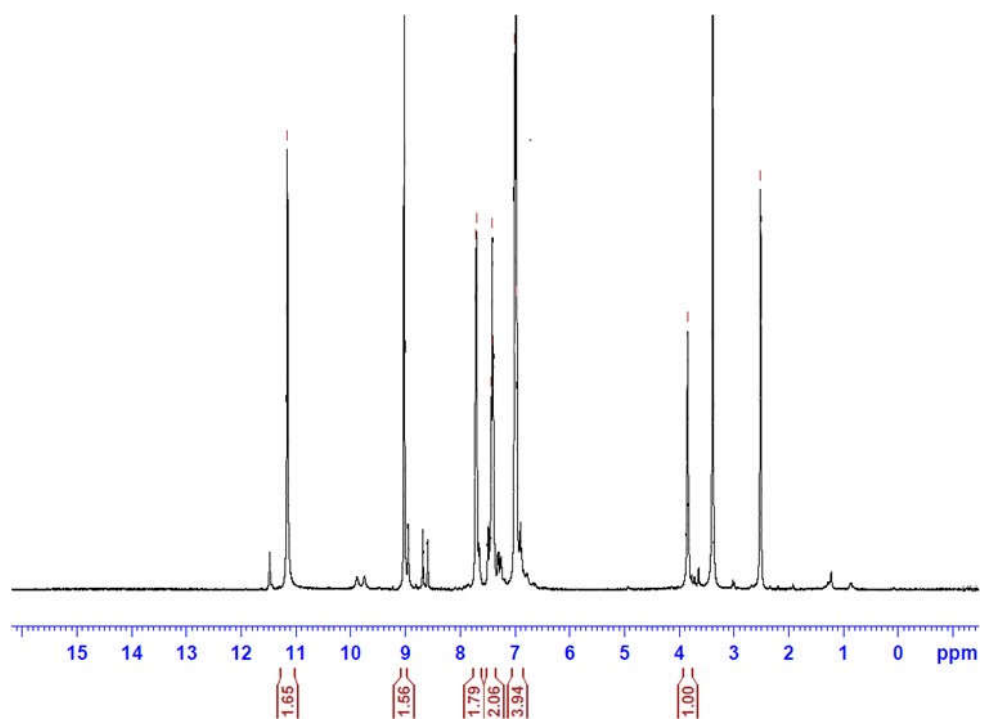

Figure S13:  $^1\text{H}$ -NMR spectrum of compound 8c.

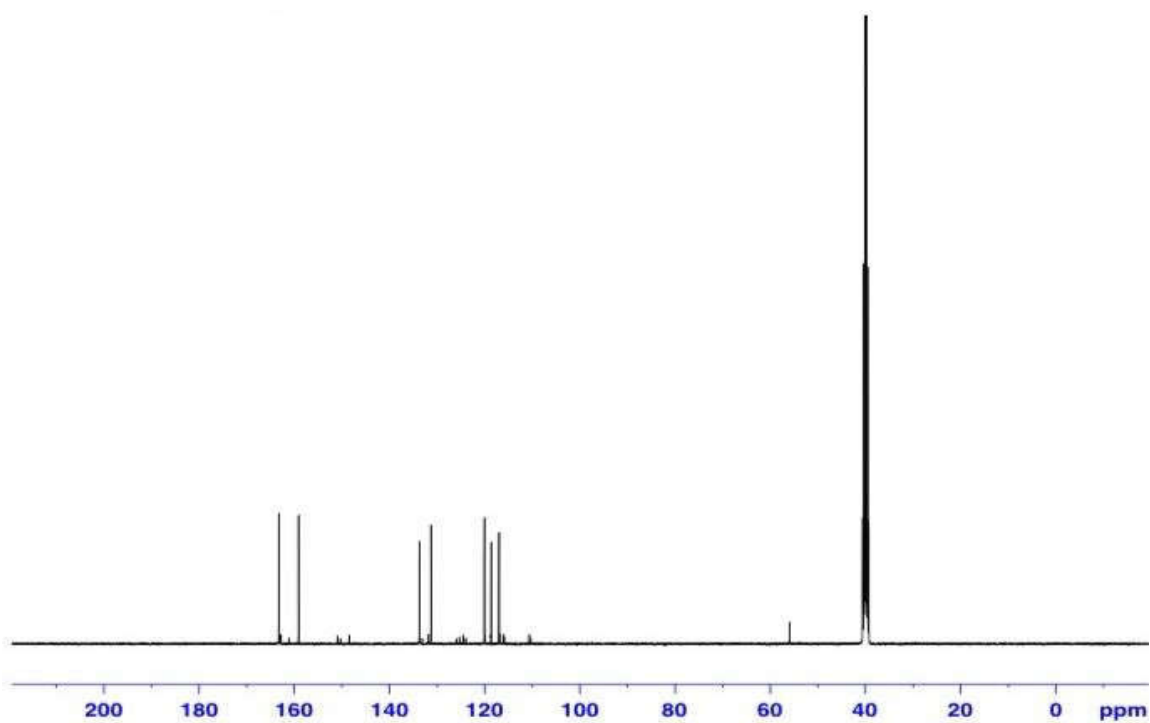

Figure S14:  $^{13}\text{C}$ -NMR spectrum of compound 8c.

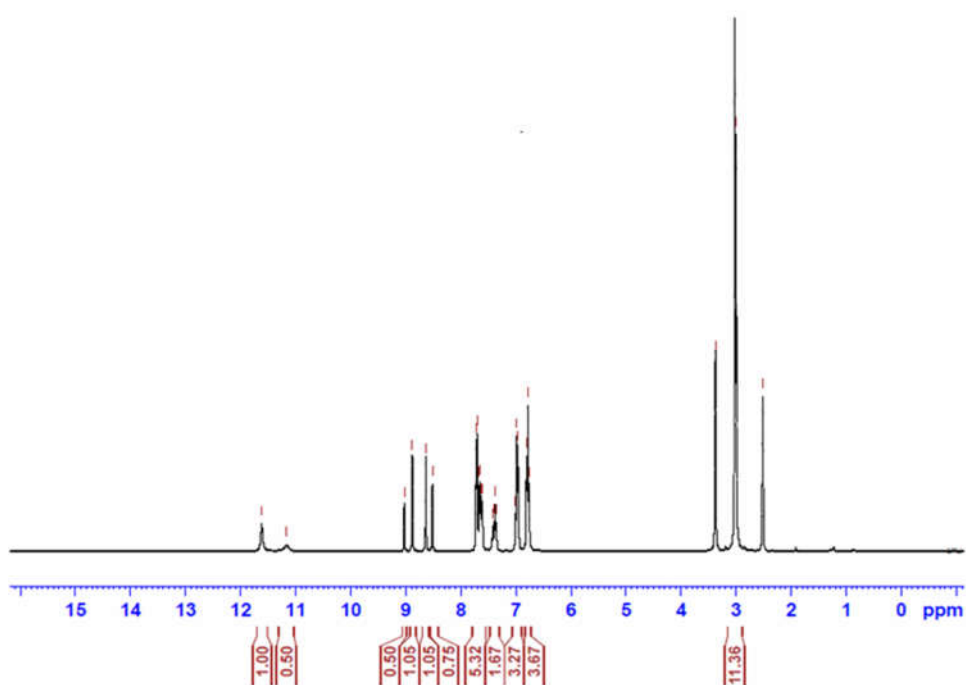

Figure S15:  $^1\text{H}$ -NMR spectrum of compound 8d.

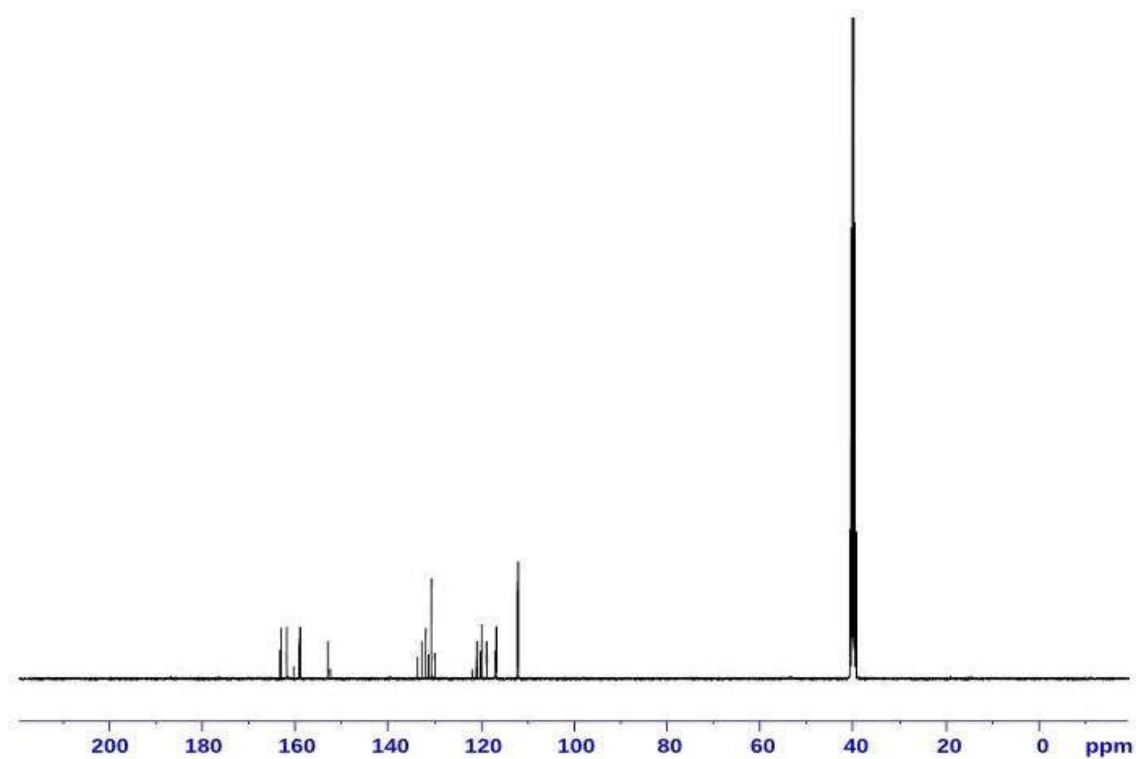

Figure S16:  $^{13}\text{C}$ -NMR spectrum of compound 8d.
